# Supplementary material for: Precision ethylene-styrene copolymers through the ring opening metathesis polymerization of 3-phenyl cyclododecenes
Source: Royal Society of Chemistry journal article supplement (doi:10.1039/d0py01721c), 2021-01-01
Supplement: d0py01721c1.pdf [file d0py01721c1.pdf]

## Supporting Information

# Precision Ethylene-Styrene Copolymers through the Ring Opening Metathesis Polymerization of 3-Phenyl Cyclododecenes

Sebla Onbulak and Marc A. Hillmyer\*

Department of Chemistry, University of Minnesota, Minneapolis, MN 55455-0431

\*Corresponding author (e-mail: [hillmyer@umn.edu](mailto:hillmyer@umn.edu))

## Table of Contents

|                                                                                                          |     |
|----------------------------------------------------------------------------------------------------------|-----|
| <sup>1</sup> H NMR characterization of <i>E</i> , <i>Z</i> -3PhCDE and <i>E</i> , <i>Z</i> -3BrCDE ..... | S2  |
| Synthesis of <i>Z</i> -3PhCDE .....                                                                      | S3  |
| <sup>1</sup> H NMR characterization of <i>Z</i> -3PhCDE and <i>E</i> , <i>Z</i> -3PhCDE .....            | S3  |
| Synthesis of poly(CDE) and poly(3PhCOE) model compounds .....                                            | S4  |
| <sup>1</sup> H NMR and <sup>13</sup> C NMR spectra of poly(CDE) hh model compound .....                  | S4  |
| <sup>13</sup> C NMR spectrum of poly(3PhCOE) ht model compound .....                                     | S5  |
| <sup>1</sup> H NMR characterization of polymer <b>P1</b> and <b>P13</b> (olefinic region) .....          | S5  |
| <sup>1</sup> H NMR monitoring during ROMP of CDE with CTA .....                                          | S6  |
| Formation of first initiating species in ROMP with/without CTA .....                                     | S6  |
| <sup>1</sup> H NMR spectra comparison of ROMP of 3PhCDE with two different CTAs .....                    | S7  |
| <sup>1</sup> H NMR characterization of change in the error with molar mass .....                         | S7  |
| <sup>1</sup> H NMR spectra of <b>P3</b> before and after hydrogenation .....                             | S8  |
| <sup>13</sup> C NMR spectra of poly(3PhCOE) model compound vs poly(3PhCDE) .....                         | S8  |
| <sup>13</sup> C NMR spectra of <b>P3</b> before and after hydrogenation .....                            | S9  |
| <sup>13</sup> C NMR and <sup>1</sup> H NMR spectra of hydrogenated <b>HP3</b> vs <b>HP13</b> .....       | S10 |
| Pseudo first-order kinetic plot of the ROMP of 3PhCDE. ....                                              | S11 |
| SEC characterization curves and data for selected poly(3PhCDE) polymers. ....                            | S12 |

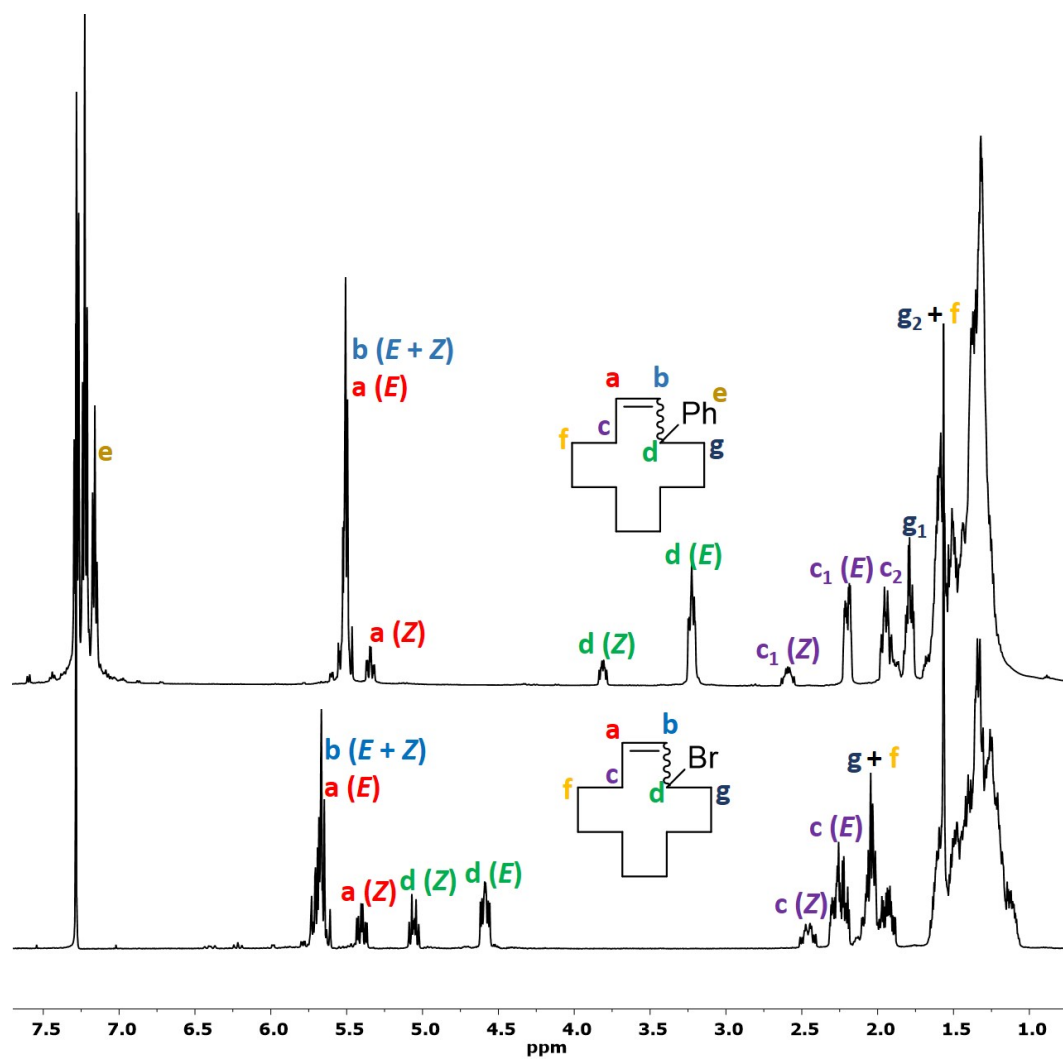

**Figure S1.**  $^1\text{H}$  NMR spectra of  $E,Z$ -3-phenyl-1-cyclododecene (top) and  $E,Z$ -3-bromo-1-cyclododecene in  $\text{CDCl}_3$ .

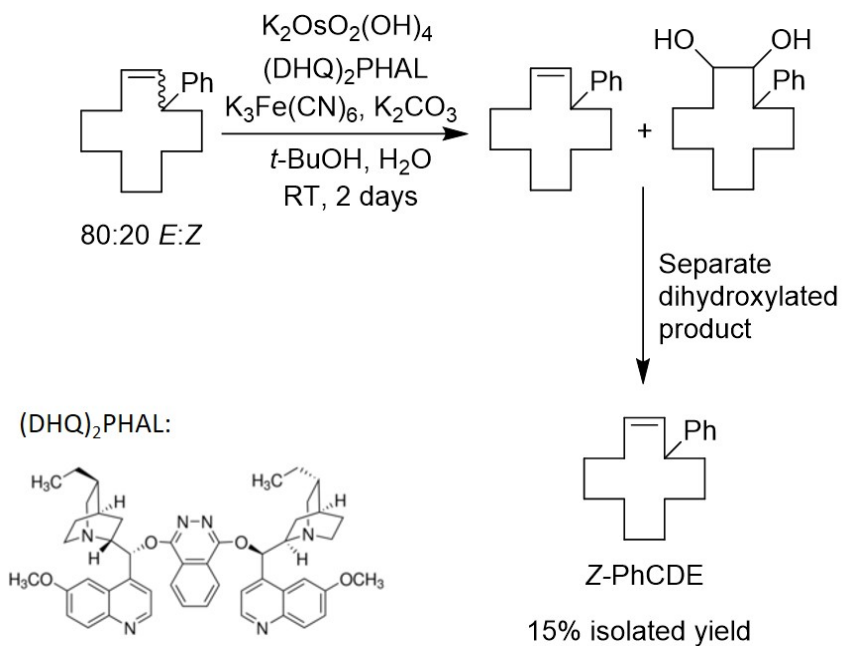

**Figure S2.** Synthesis of *Z*-3-Phenyl-1-cyclododecene.

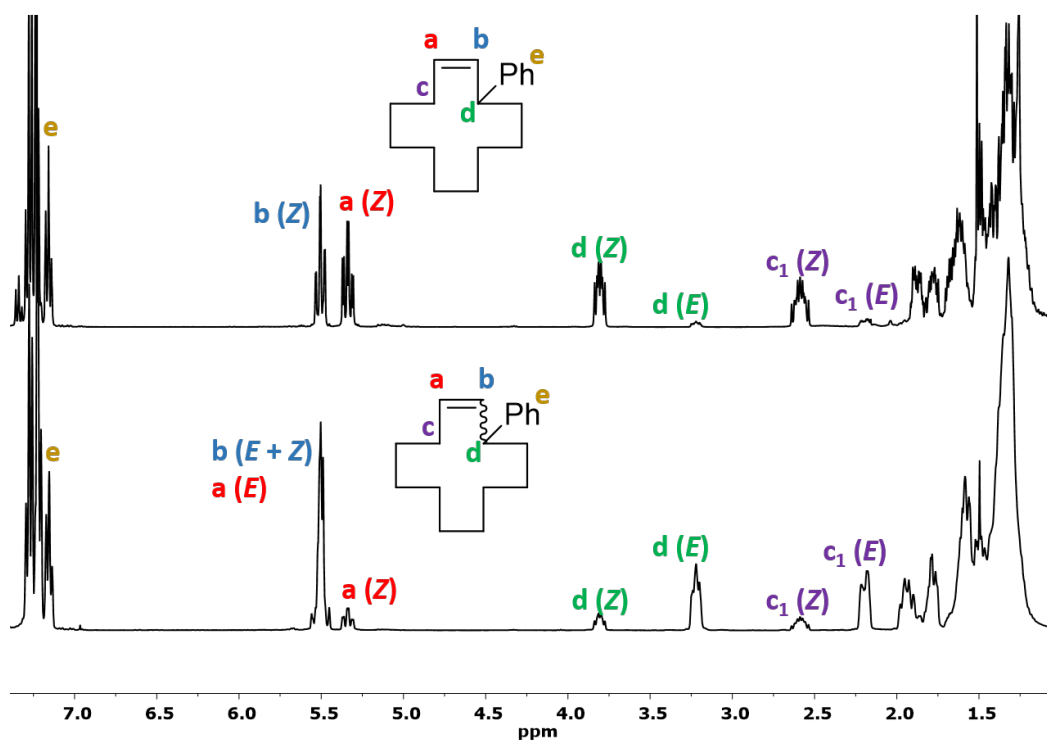

**Figure S3.** <sup>1</sup>H NMR spectra of *E,Z*-3-phenyl-1-cyclododecene (top) and *Z*-3-phenyl-1-cyclododecene (bottom) in CDCl<sub>3</sub>.

### Head-to-head assignment (hh)

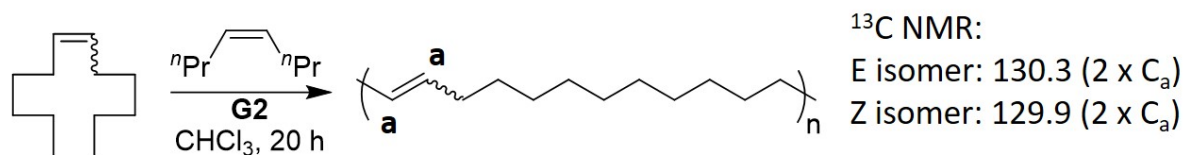

### Head-to-tail assignment (ht)

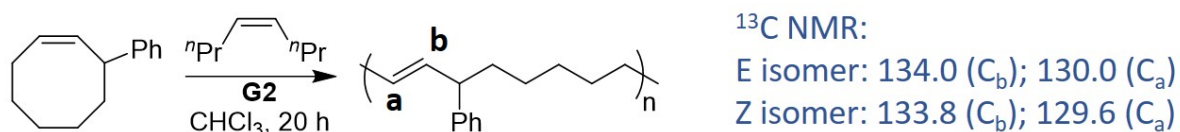

**Figure S4.** Synthesis of poly(CDE) and poly(3PhCOE) polymers by ROMP for hh and ht regioisomer assignments by <sup>13</sup>C NMR spectroscopy.

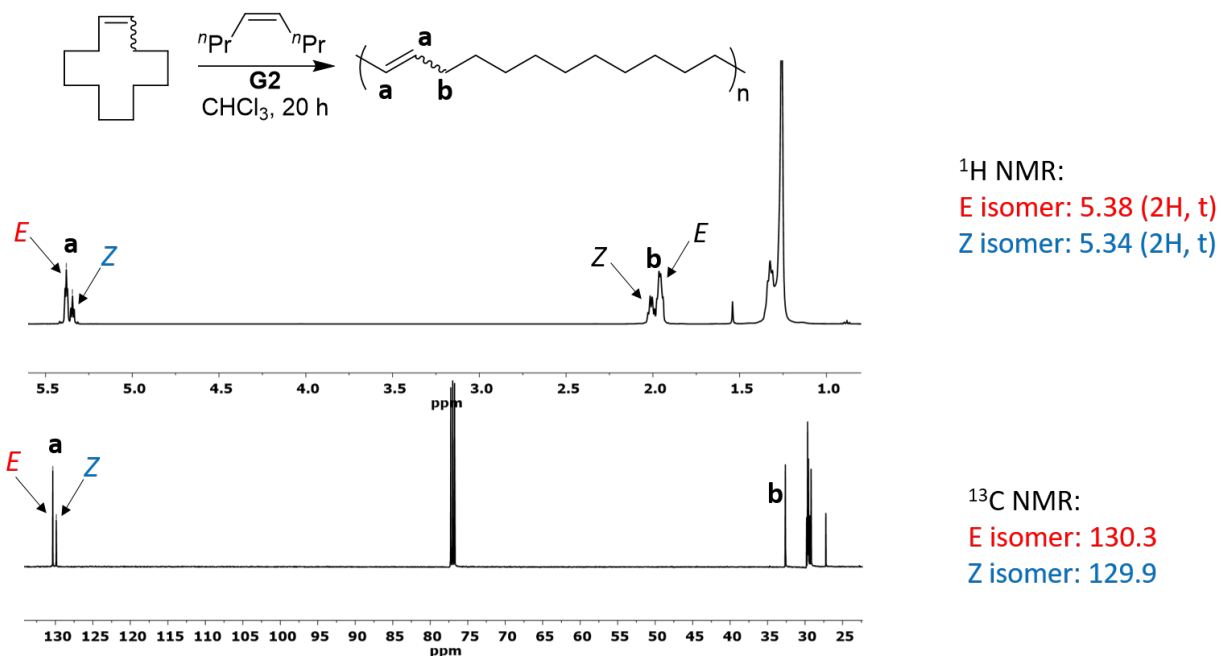

**Figure S5.** <sup>1</sup>H NMR and <sup>13</sup>C NMR spectrum of poly(CDE) polymer in CDCl<sub>3</sub>

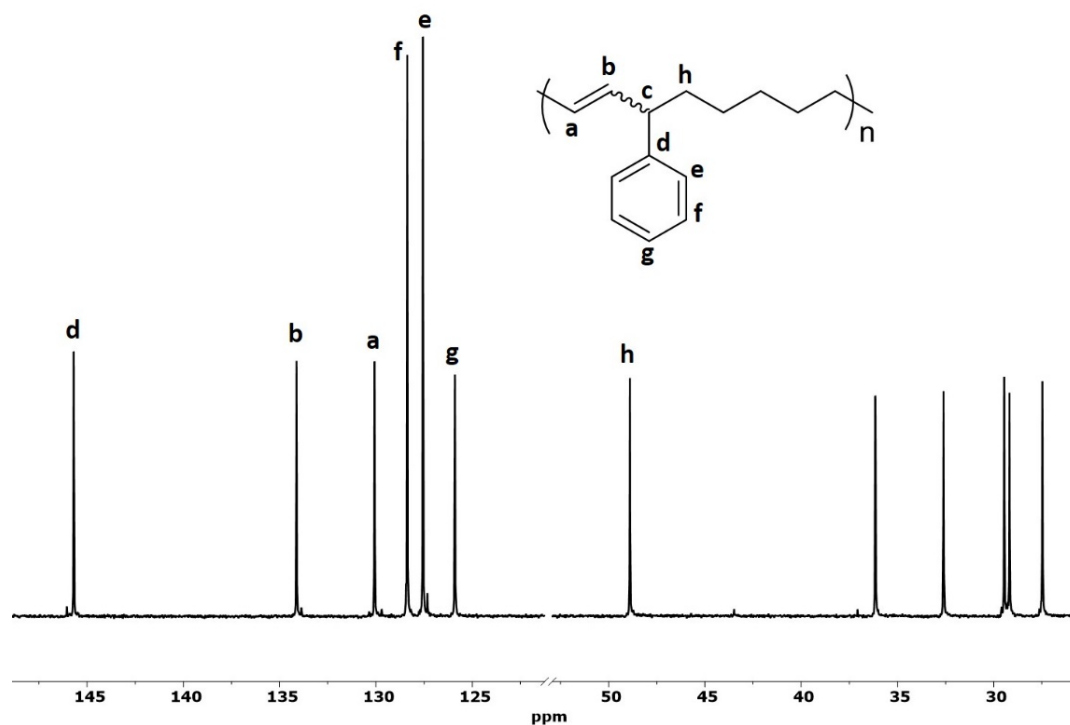

**Figure S6.**  $^{13}\text{C}$  NMR spectrum of poly(3PhCOE) polymer in  $\text{CDCl}_3$ .

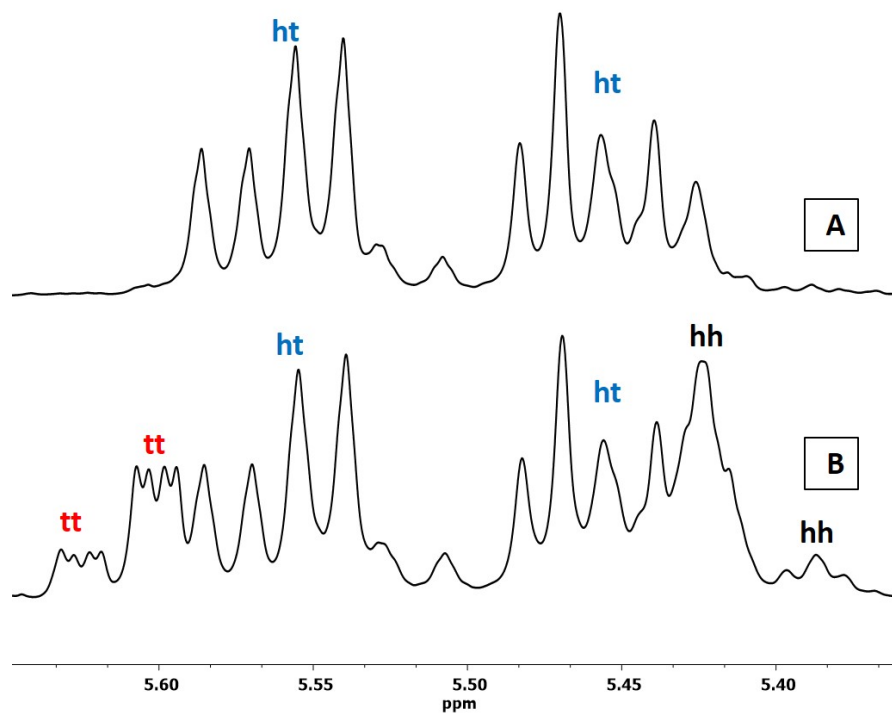

**Figure S7.** Partial  $^1\text{H}$  NMR spectra of the (A) polymer **P1** with the CTA present, and (B) polymer **P13** without the CTA in  $\text{CDCl}_3$ .

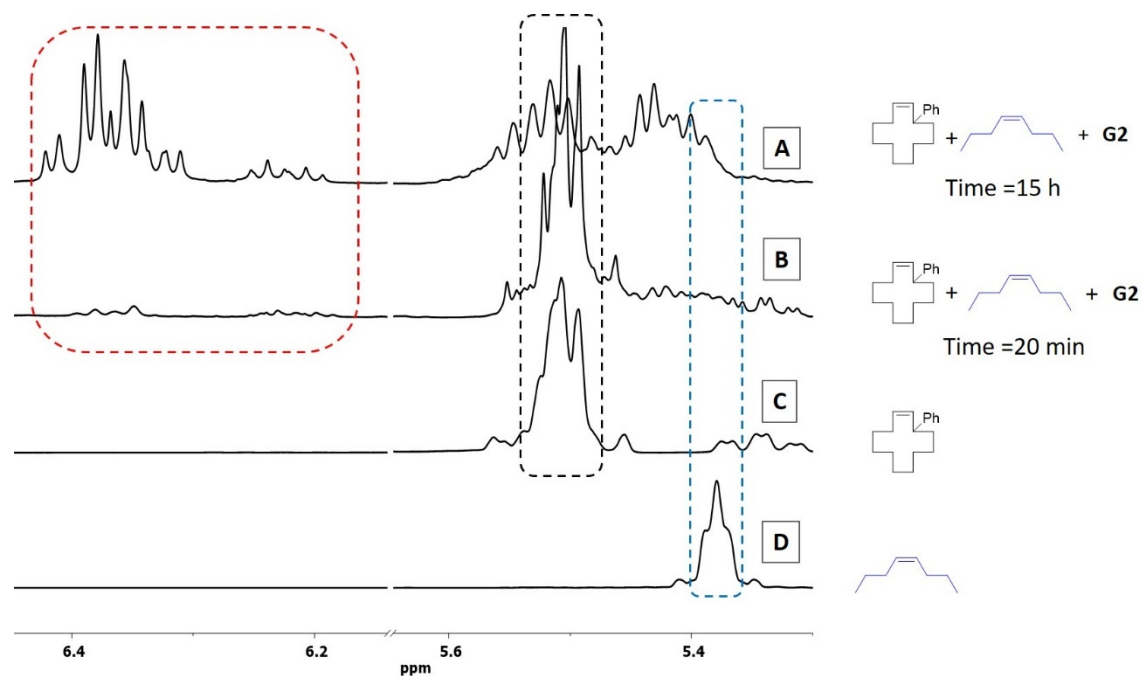

**Figure S8.** Partial  $^1\text{H}$  NMR spectra of (A) ROMP reaction after 15 h, (B) ROMP reaction after 20 min, (C) PhCDE monomer and (D) *cis*-4-octene CTA in  $\text{CDCl}_3$ . The equivalences that were used for the ROMP reaction of monomer:CTA:G2 was 1:1:1.

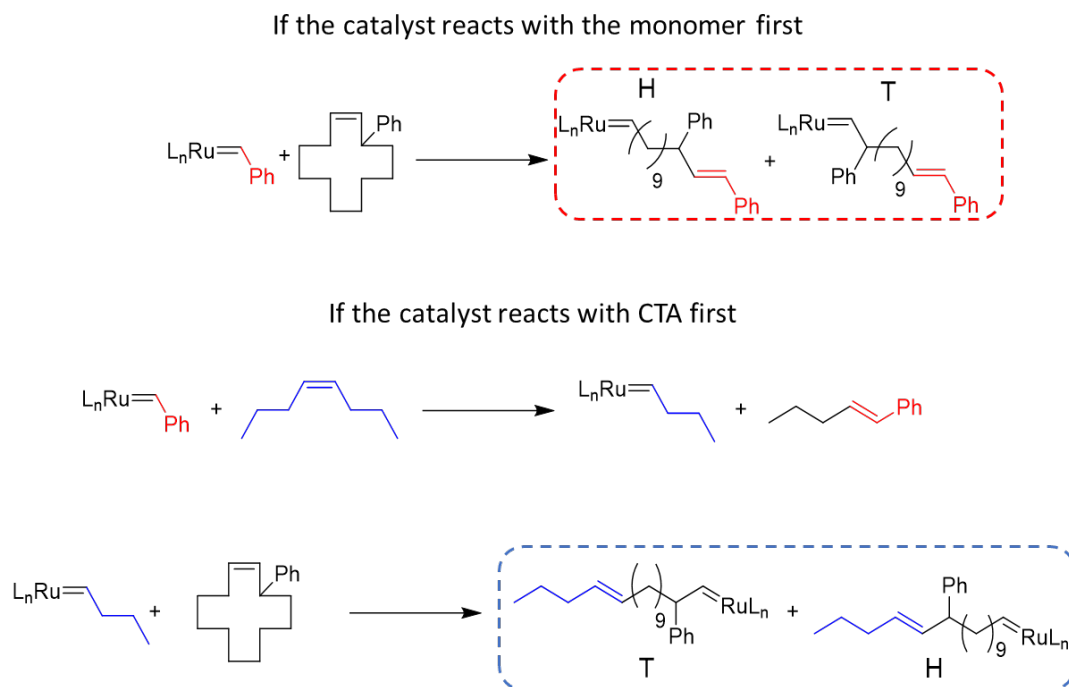

**Figure S9.** The first initiating species that are formed with and without the CTA present in the ROMP reaction mixture. The equivalences that were used for the ROMP reaction of monomer:CTA:G2 was 1:1:1.

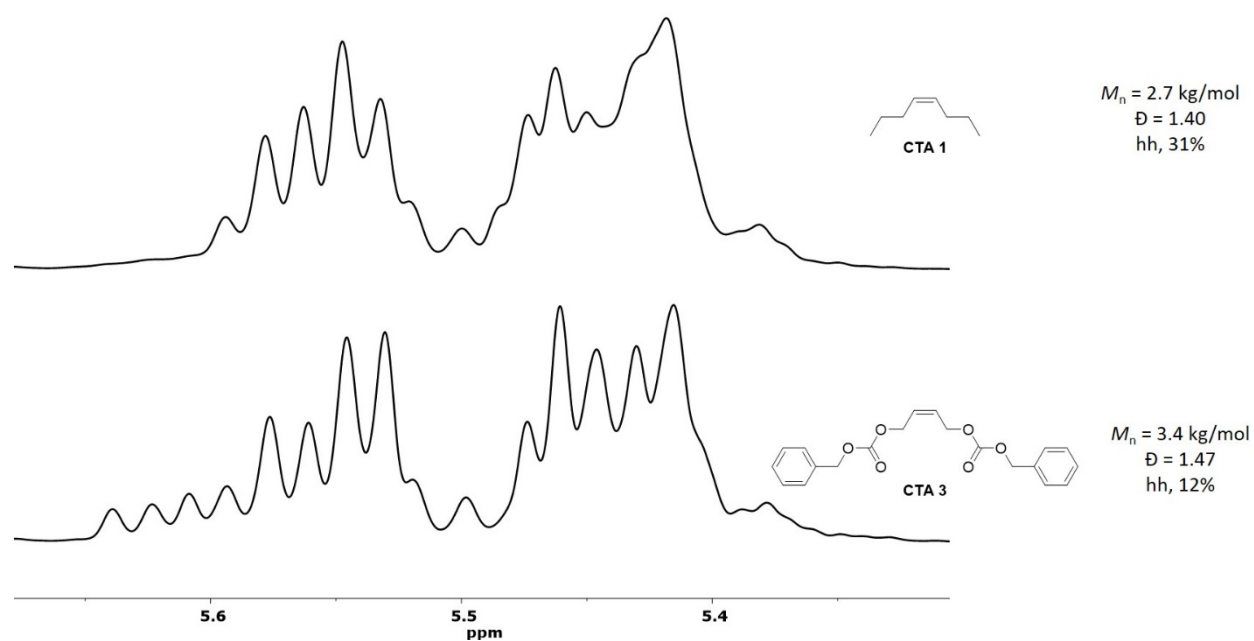

**Figure S10.** Partial  $^1\text{H}$  NMR spectra of low molar mass polymer synthesized with cis-4-octene CTA (top) and with carboxybenzyl CTA (bottom) in  $\text{CDCl}_3$ . The hh error dropped from 31% to 12% with the change in the CTA.

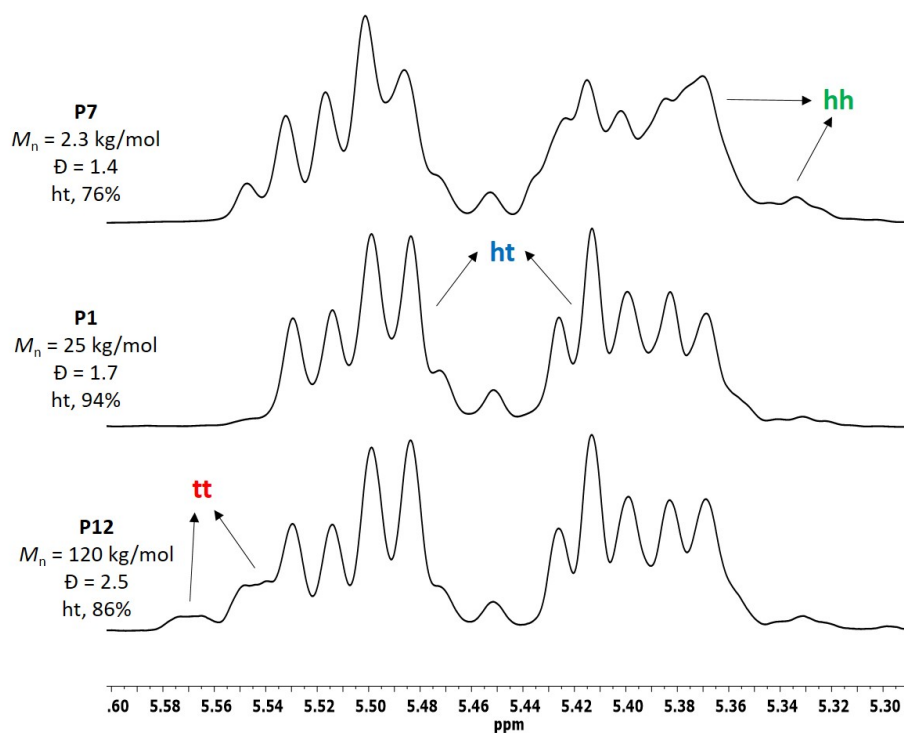

**Figure S11.** The change in the error with the change in the molar mass of the polymer. Partial  $^1\text{H}$  NMR spectra of **P12**, **P1** and **P7** polymers synthesized with *cis*-4-octene CTA in  $\text{CDCl}_3$ .

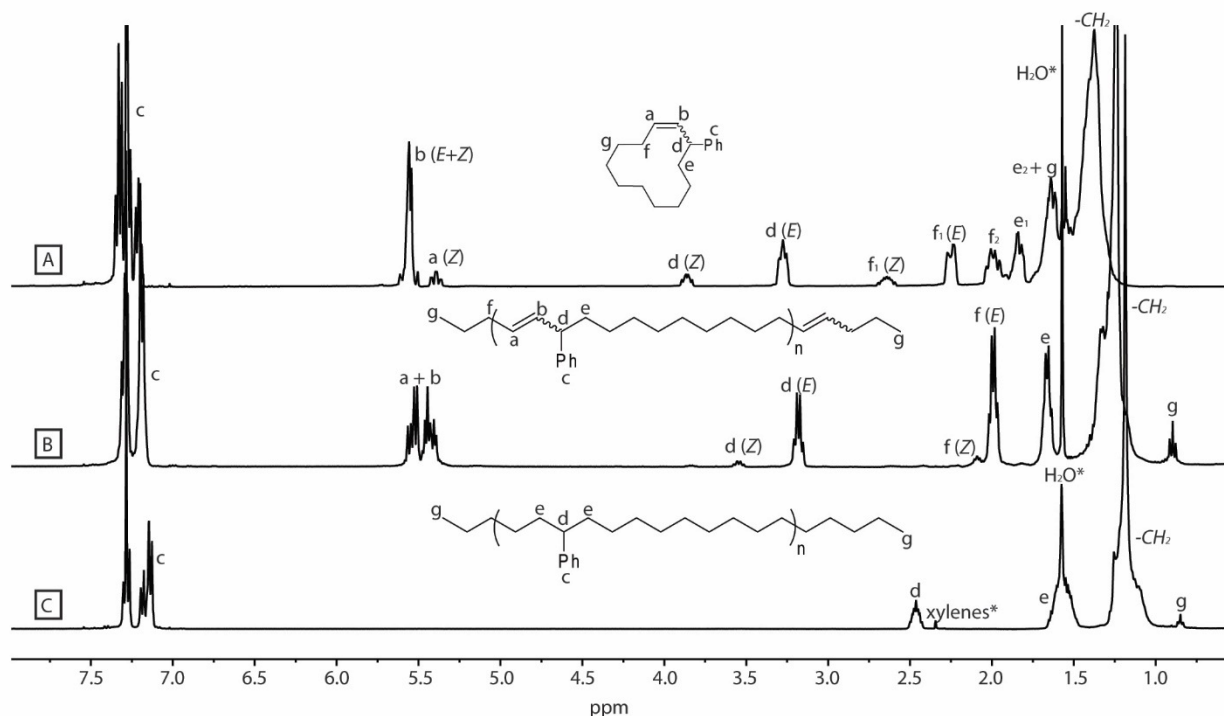

**Figure S12**  $^1\text{H}$  NMR spectra of (A) 3PhCDE monomer, (B) poly(3PhCDE) polymer, and (C) hydrogenated poly(3PhCDE) polymer in  $\text{CDCl}_3$ .

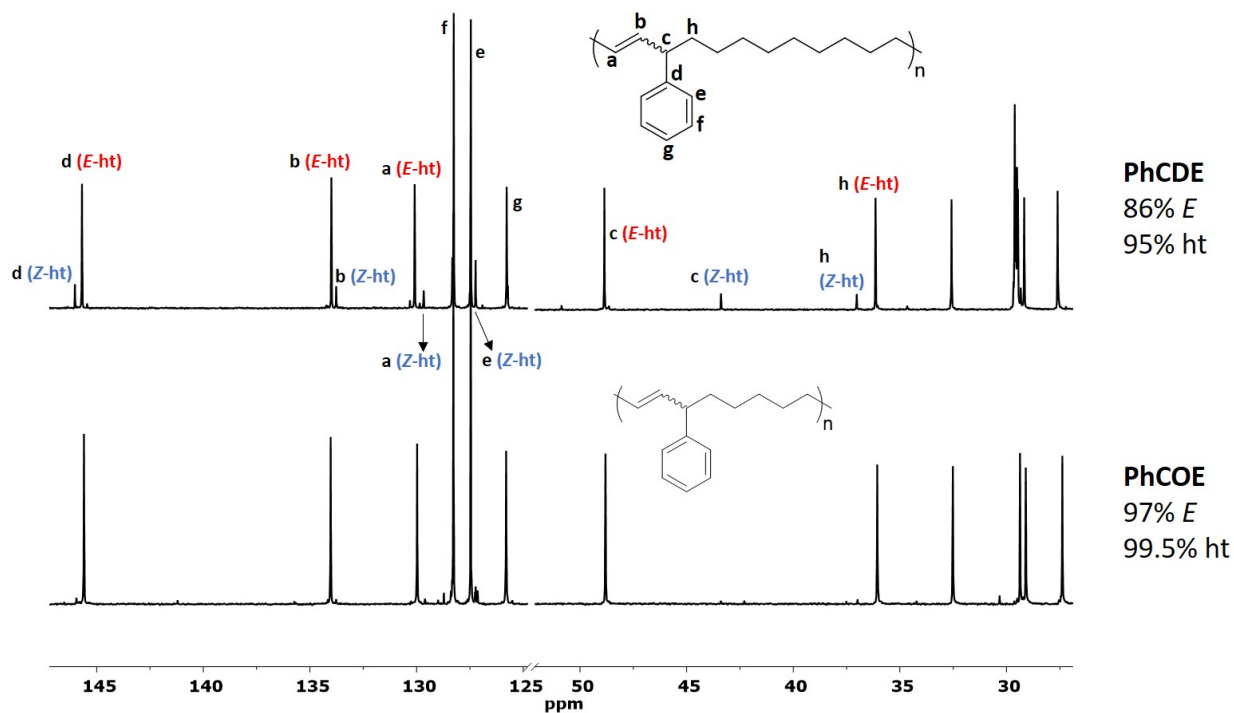

**Figure S13.** Difference in the  $^{13}\text{C}$  NMR spectra of unsaturated poly(3PhCOE) model compound (bottom) vs poly(3PhCDE) (top).

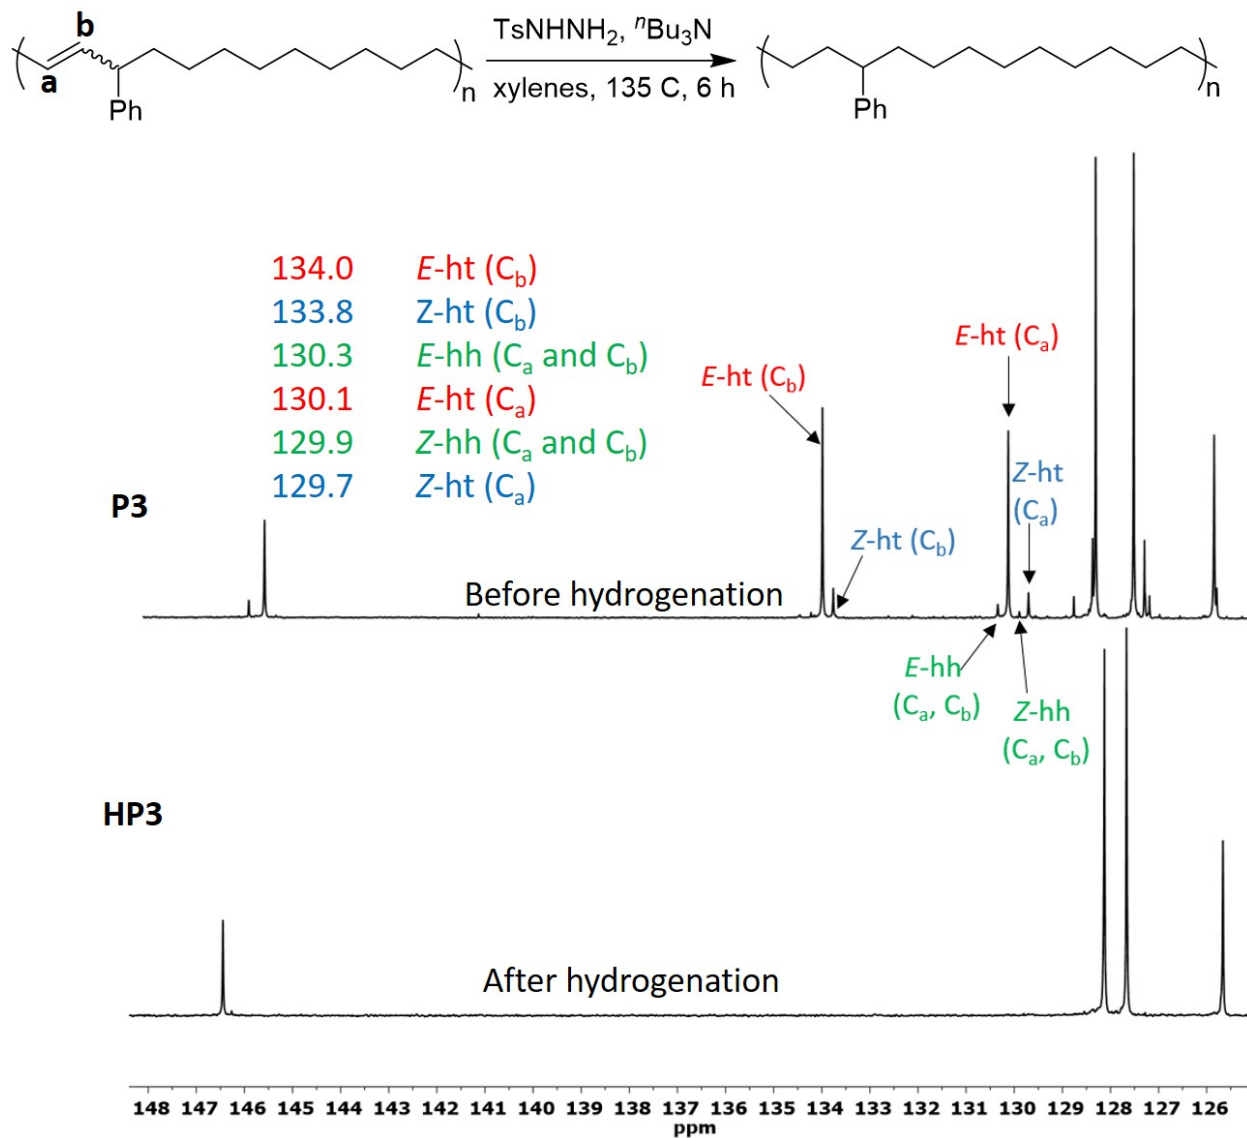

**Figure S14.** Partial  $^{13}\text{C}$  NMR spectra and isomer assignment of **P3** before (top) and after hydrogenation (bottom).

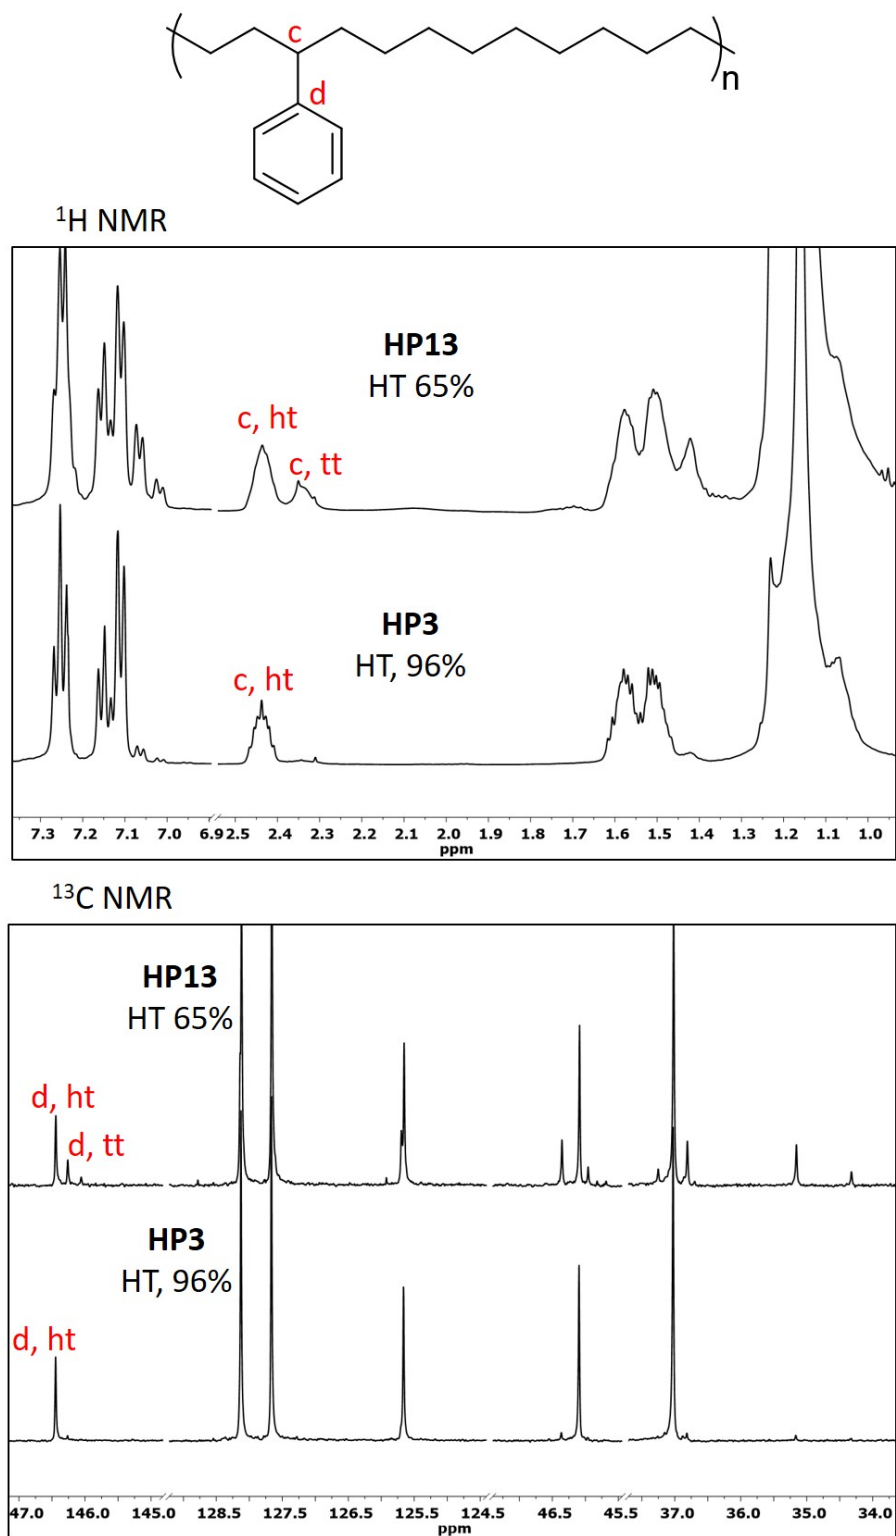

**Figure S15.** Partial <sup>1</sup>H NMR (top) and <sup>13</sup>C NMR (bottom) spectra of the (A) polymer **HP13** with low regioregularity, and (B) polymer **HP3** with high regioregularity in CDCl<sub>3</sub>.

The nonlinearity of the pseudo first-order kinetic plot may be due to slow initiation at early times where an increase in the rate of conversion was observed.

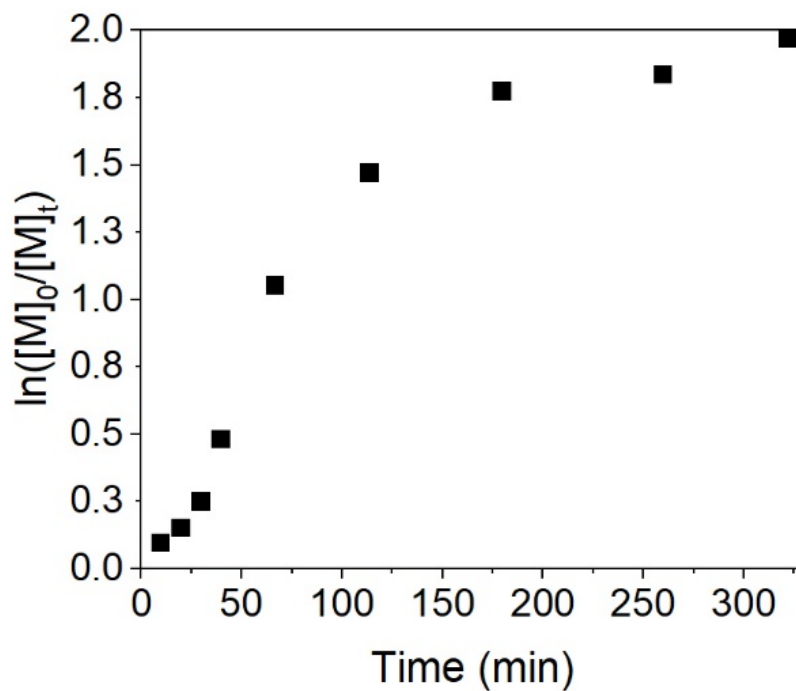

**Figure S16.** Pseudo first-order kinetic plot of the ROMP of 3PhCDE. The data was taken from the solution polymerization of 3PhCDE with G2 catalyst at 40 °C for 15 h. Initial monomer concentration was 4M, whereas the catalyst concentration was 0.05 mol%.

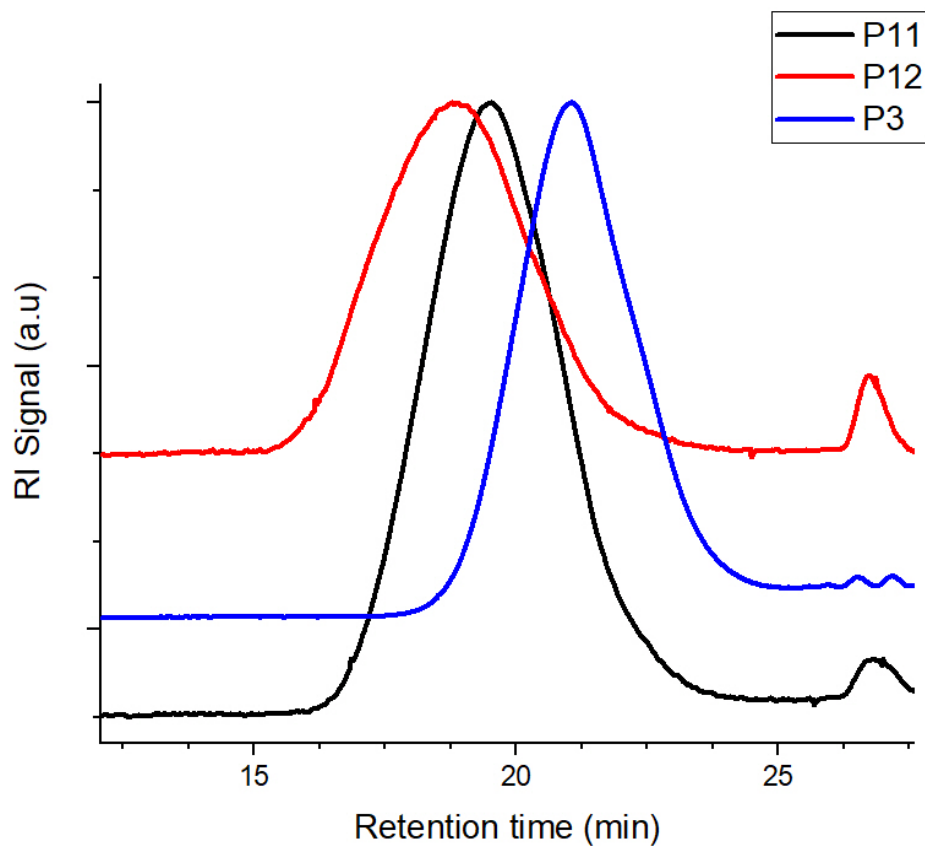

| Polymer <sup>a</sup> | $M_w$<br>(kg mol <sup>-1</sup> ) | $M_n$<br>(kg mol <sup>-1</sup> ) | $\bar{D}$<br>( $M_w/M_n$ ) |
|----------------------|----------------------------------|----------------------------------|----------------------------|
|                      | SEC                              | SEC                              | SEC                        |
| P3                   | 50                               | 28                               | 1.8                        |
| P11                  | 170                              | 84                               | 2.0                        |
| P12                  | 310                              | 120                              | 2.5                        |

**Figure S17.** SEC characterization curves and data for selected poly(3PhCDE) polymers. All polymerizations were carried using 0.05 mol% G2 catalyst and *cis*-4-octene as a chain transfer agent (CTA). SEC characterization data was determined based on chloroform SEC, PS standards.
